# Supplementary material for: Advances in X-ray free electron laser (XFEL) diffraction data processing applied to the crystal structure of the synaptotagmin-1 / SNARE complex
Source: eLife journal article supplement (doi:10.7554/elife.18740), 2016-10-12

Synchrotron Data

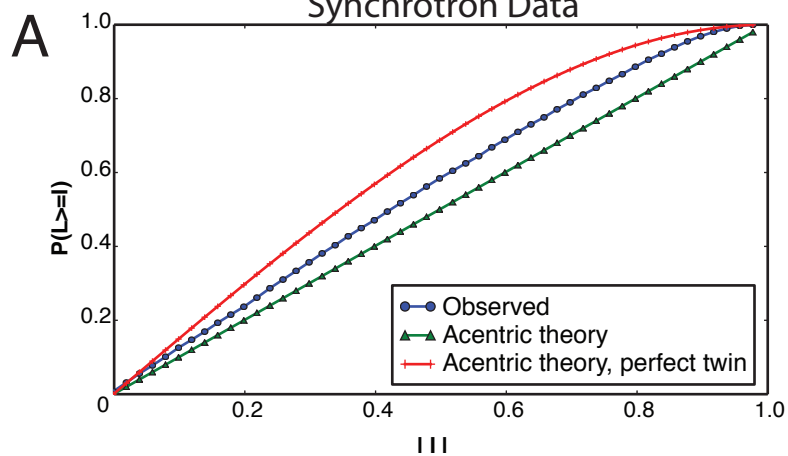

Observed XFEL Data,  $I/(\sigma(I)) > 0.5$

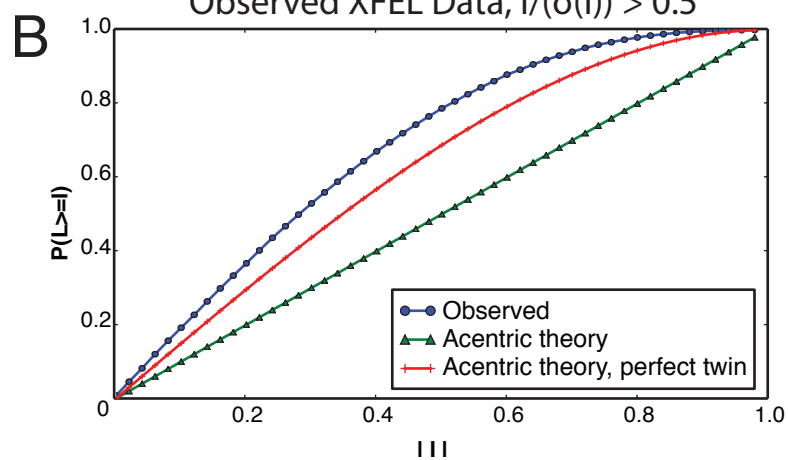

Observed XFEL Data,  $I/(\sigma(I)) > -3.0$

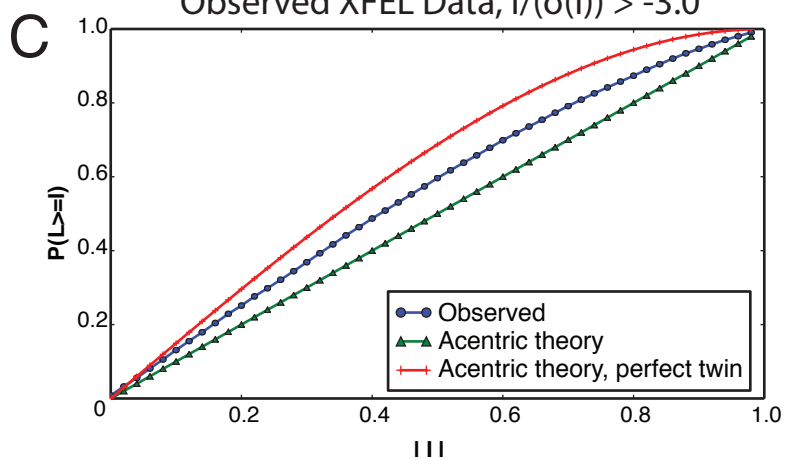

Simulated XFEL Data,  $I/(\sigma(I)) > 0.5$

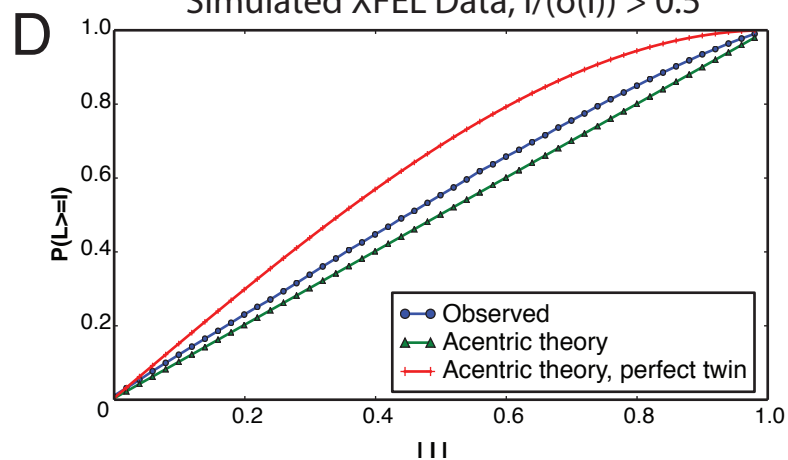

Simulated XFEL Data,  $I/(\sigma(I)) > -3.0$

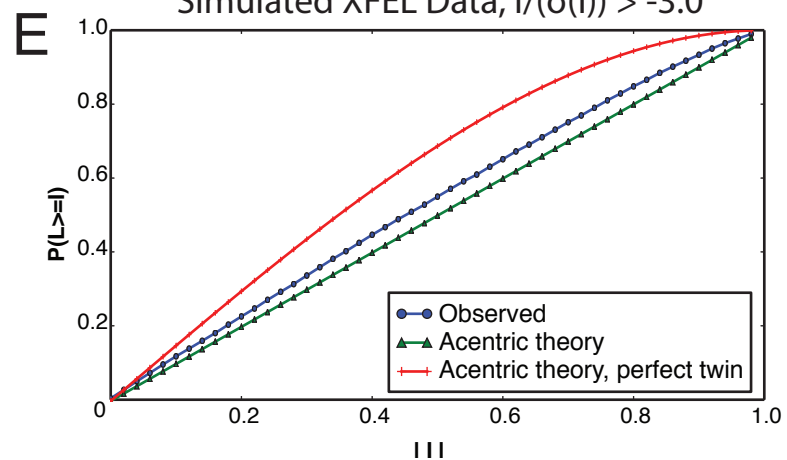

Supplement: supp [file elife-18740-supp-v1.zip]
