# Supplementary material for: Advances in X-ray free electron laser (XFEL) diffraction data processing applied to the crystal structure of the synaptotagmin-1 / SNARE complex
Source: eLife journal article supplement (doi:10.7554/elife.18740), 2016-10-12
Supplement: supp [file elife-18740-supp-v1.zip]

Archive with 9 entries (9 files):
- elife_poa_e18740_Figure_1_figure_supplement_1.pdf
- elife_poa_e18740_Figure_3_figure_supplement_3.pdf
- elife_poa_e18740_Figure_1_figure_supplement_2.pdf
- elife_poa_e18740_Figure_3_figure_supplement_2.pdf
- elife_poa_e18740_Figure_2_figure_supplement_1.pdf
- elife_poa_e18740_Table_1_source_data_1.zip
- elife_poa_e18740_Figure_3_figure_supplement_1.pdf
- elife_poa_e18740_Figure_3_figure_supplement_4.pdf
- elife_poa_e18740_Figure_4_figure_supplement_1.pdf
