# Supplementary figures and images for: Advances in X-ray free electron laser (XFEL) diffraction data processing applied to the crystal structure of the synaptotagmin-1 / SNARE complex
Source: eLife journal article supplement (doi:10.7554/elife.18740), 2016-10-12

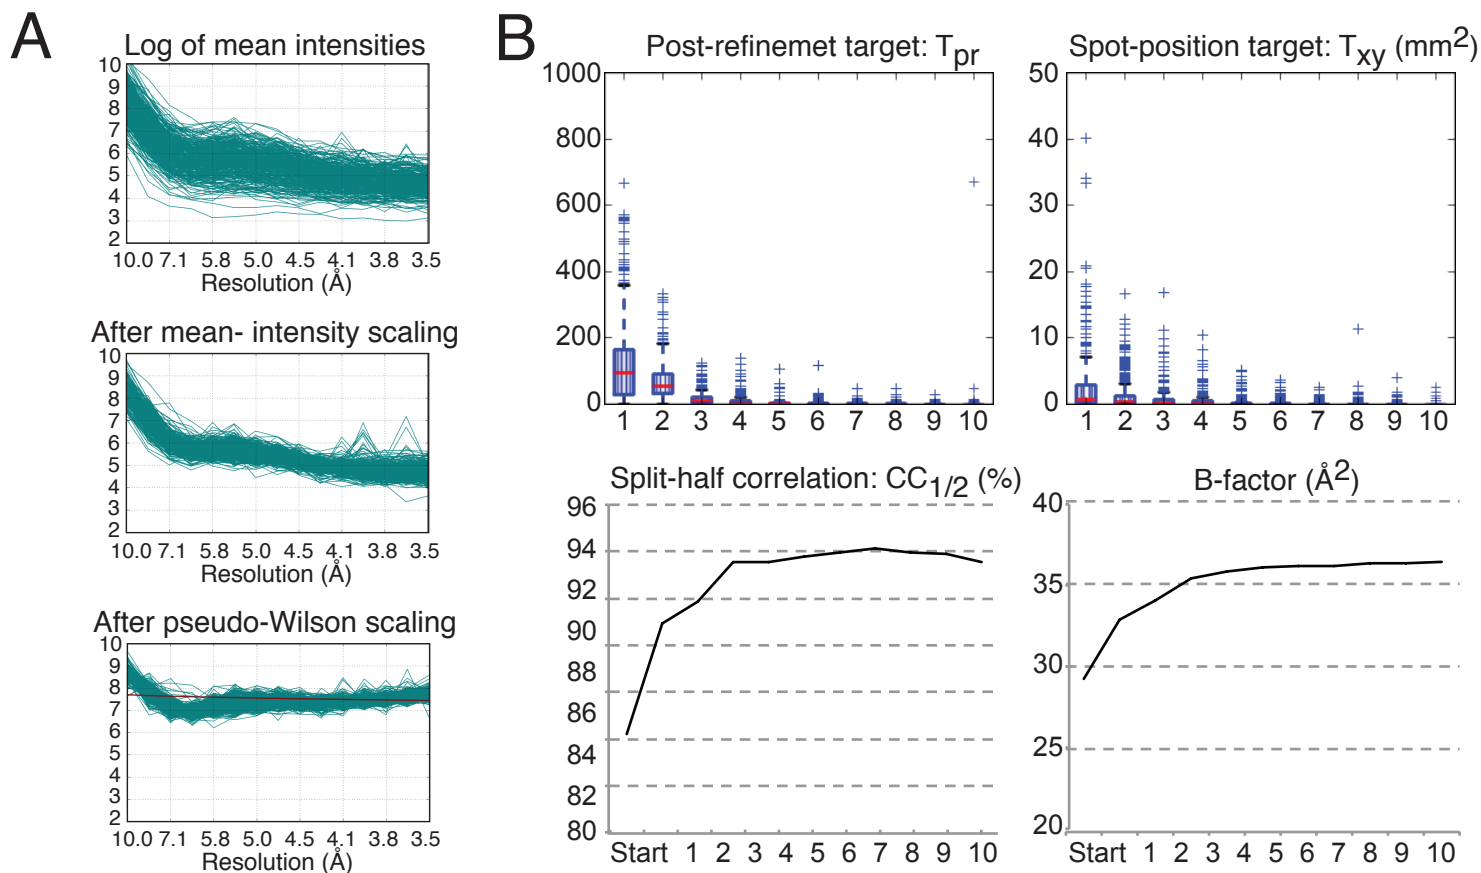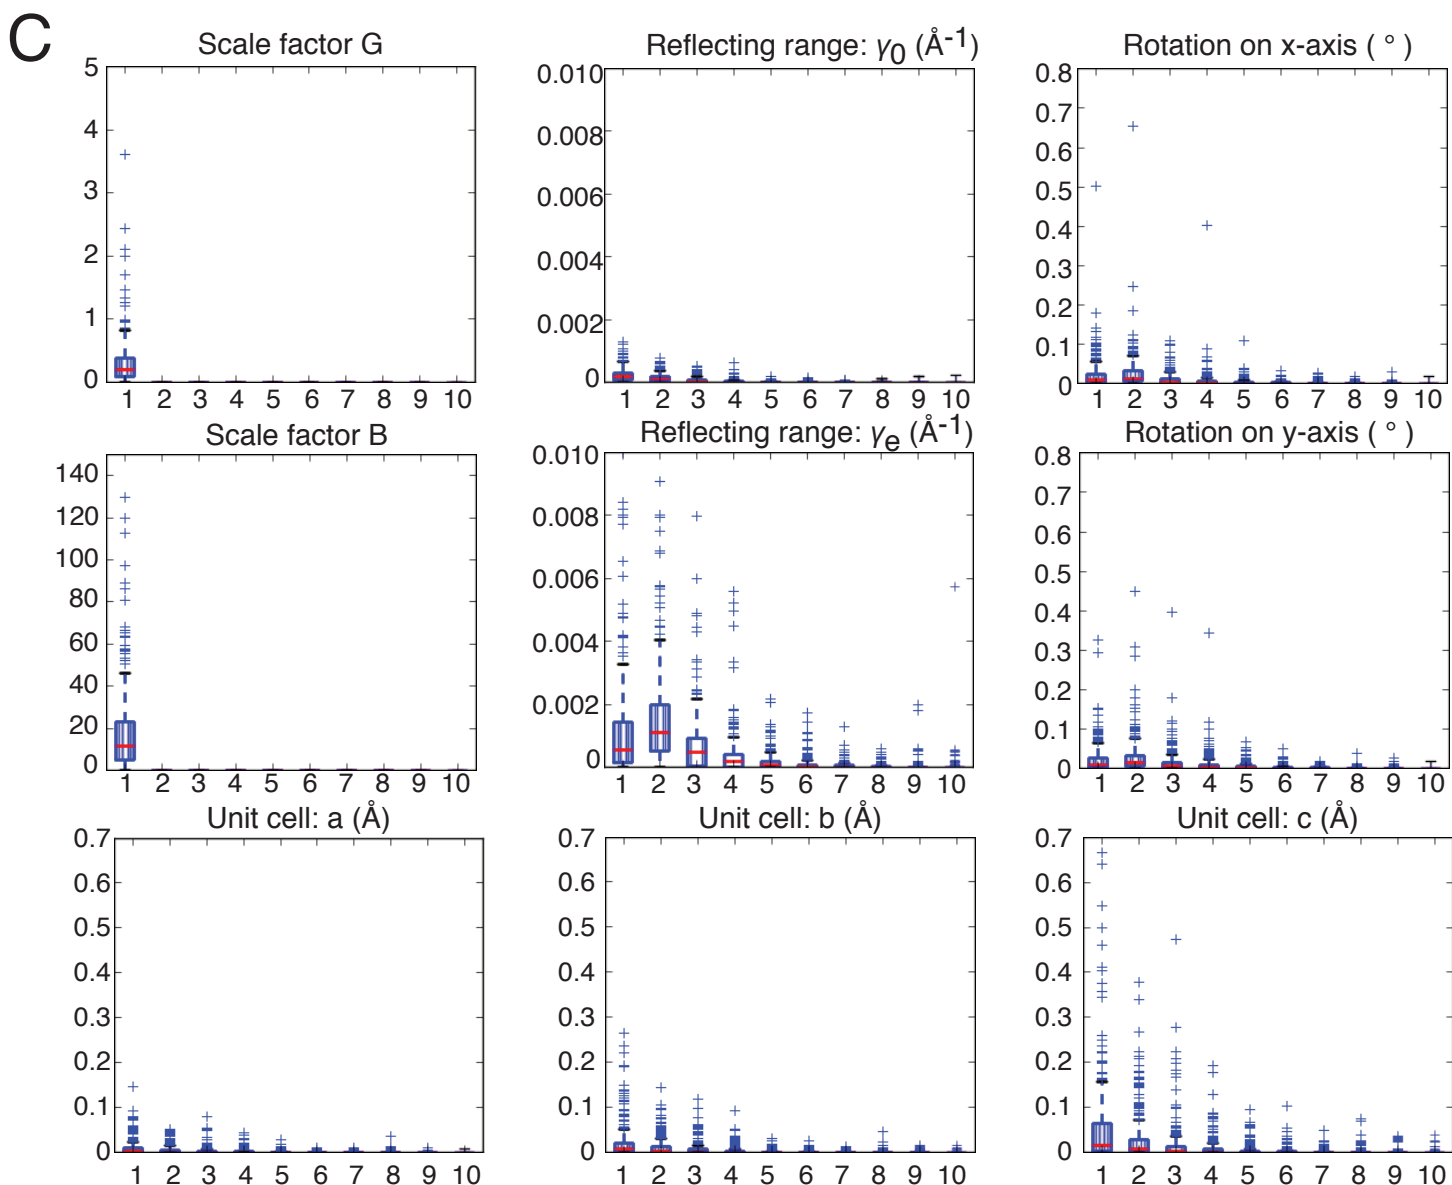

Supplement: supp [file elife-18740-supp-v1.zip]

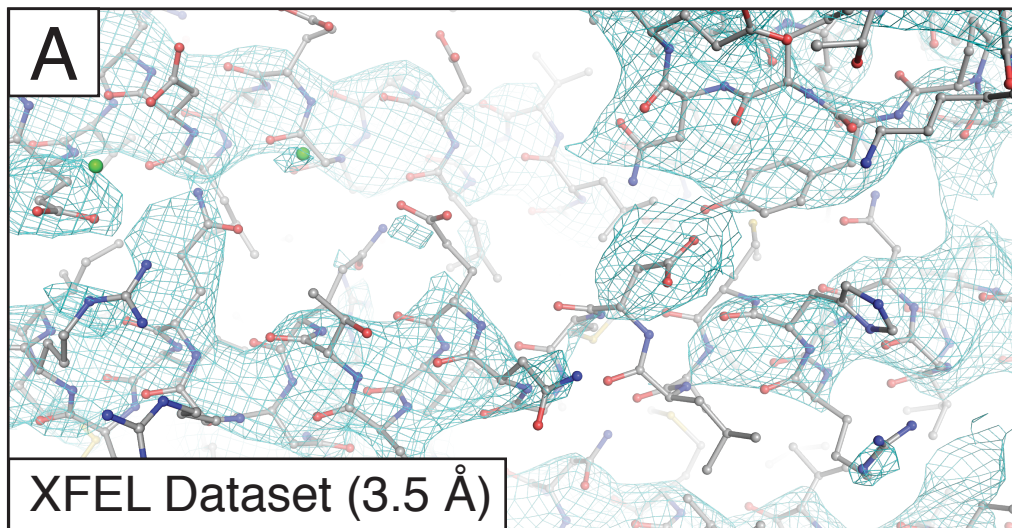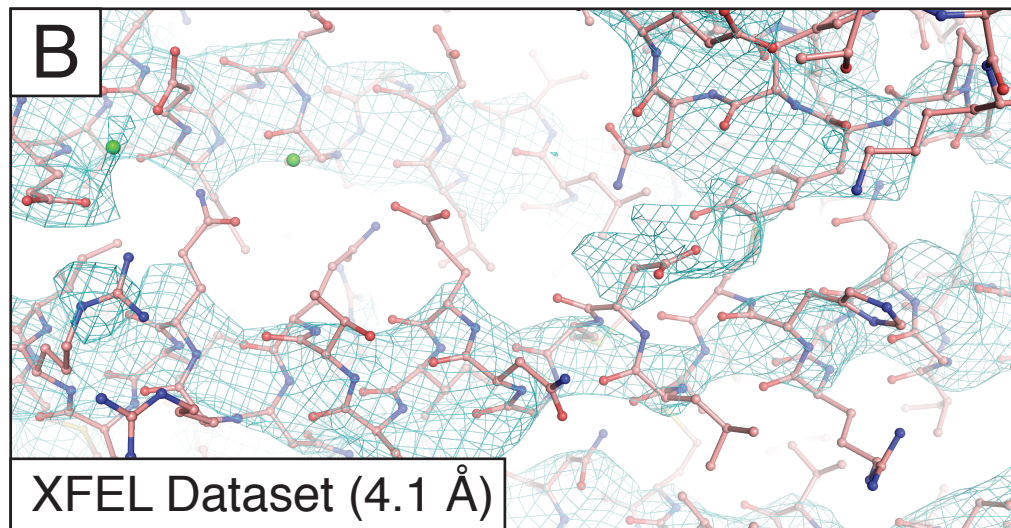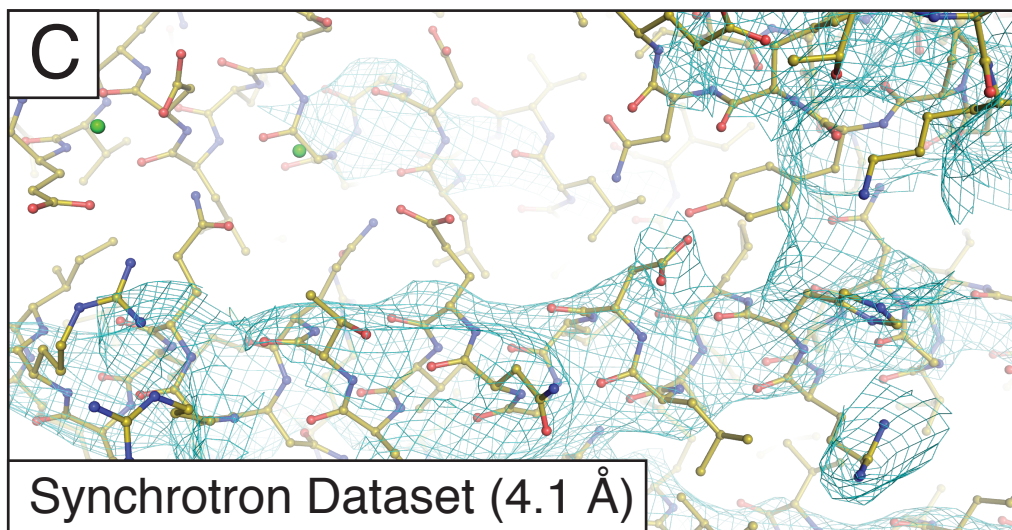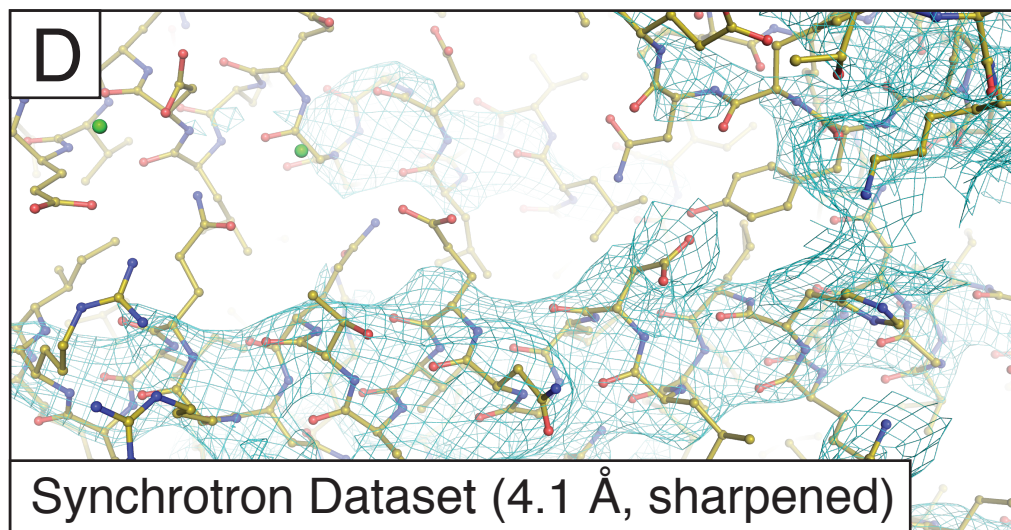

Supplement: supp [file elife-18740-supp-v1.zip]

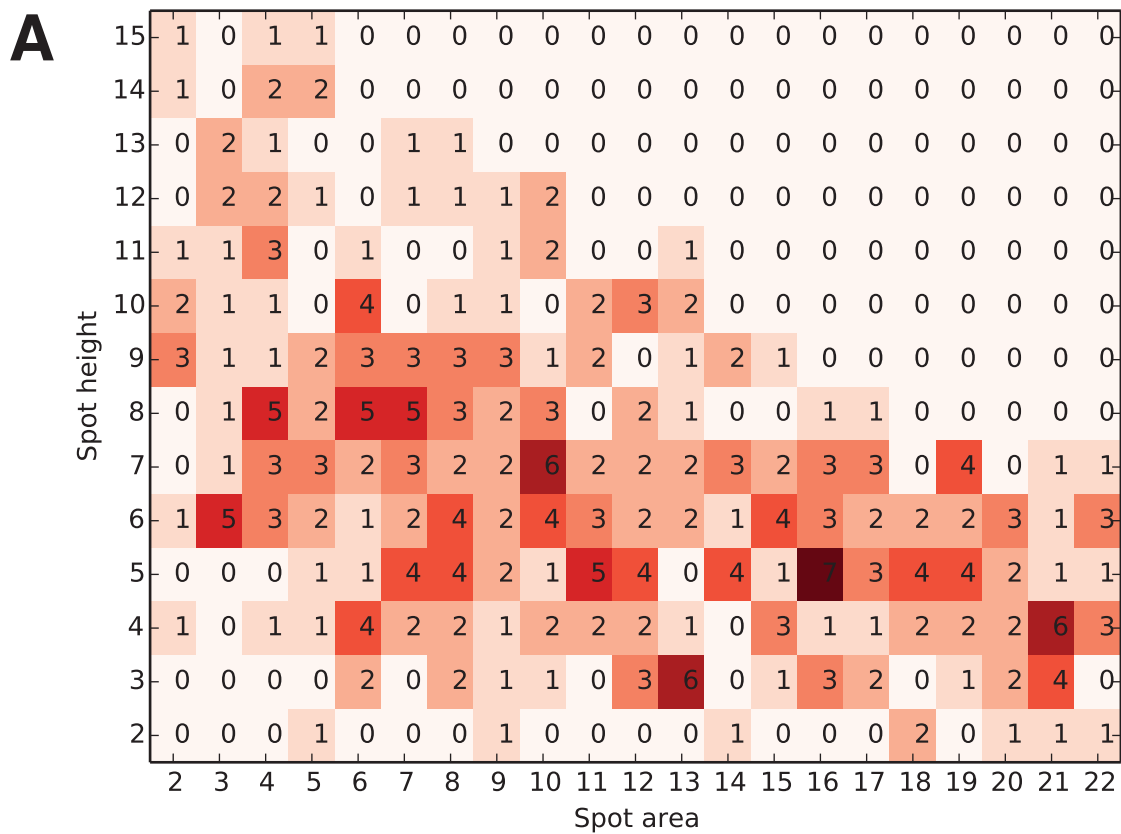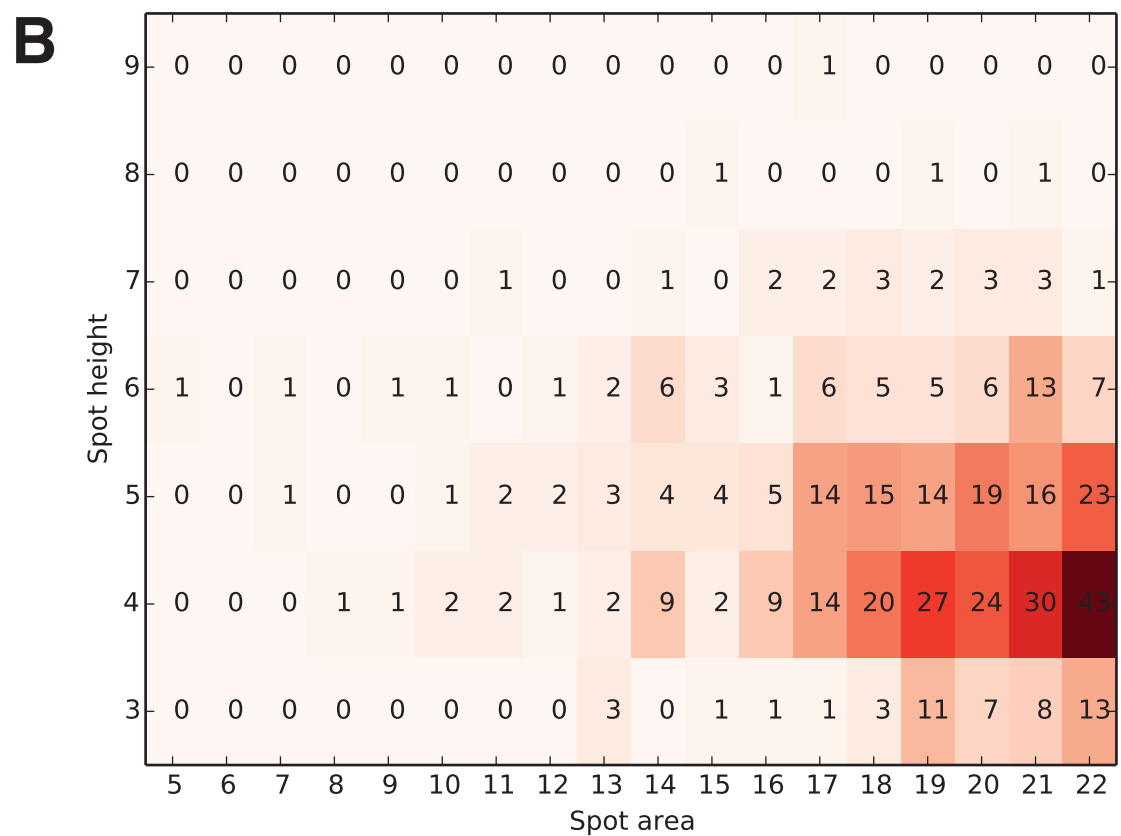

Supplement: supp [file elife-18740-supp-v1.zip]

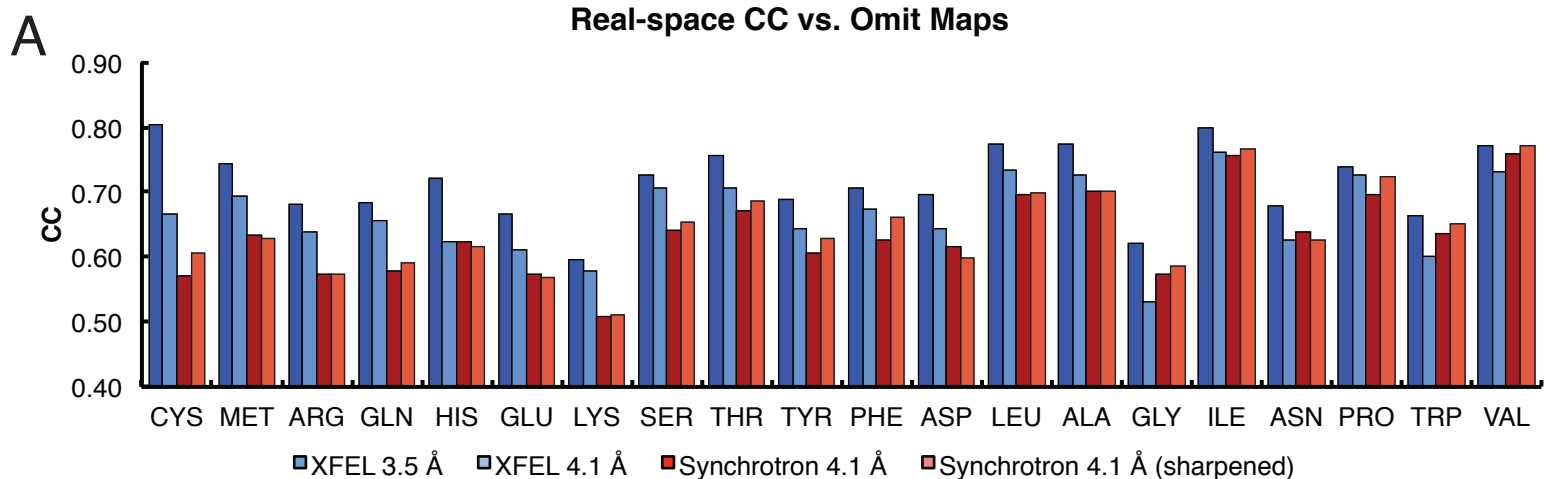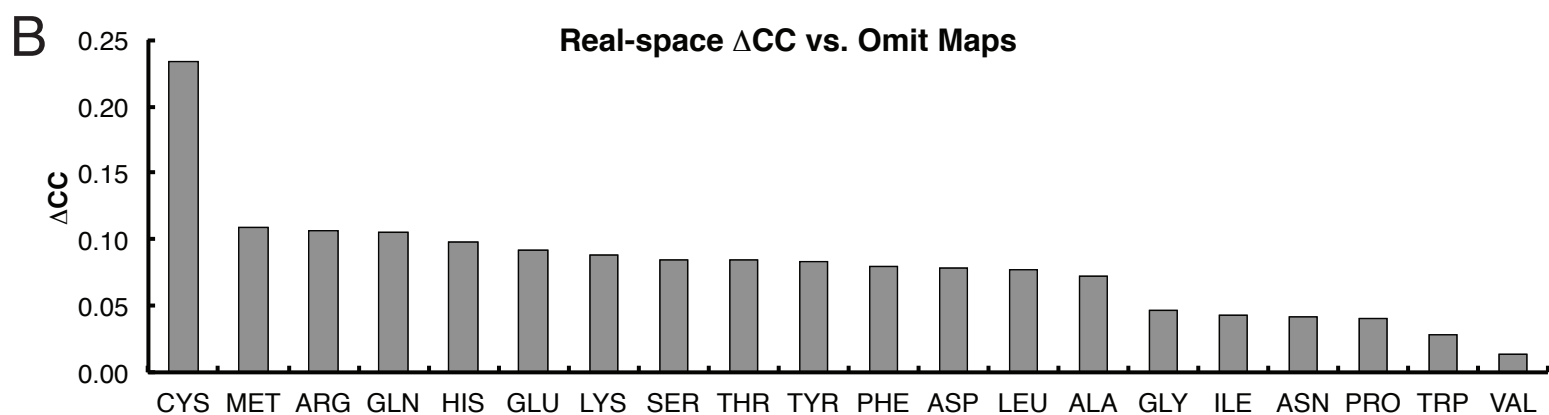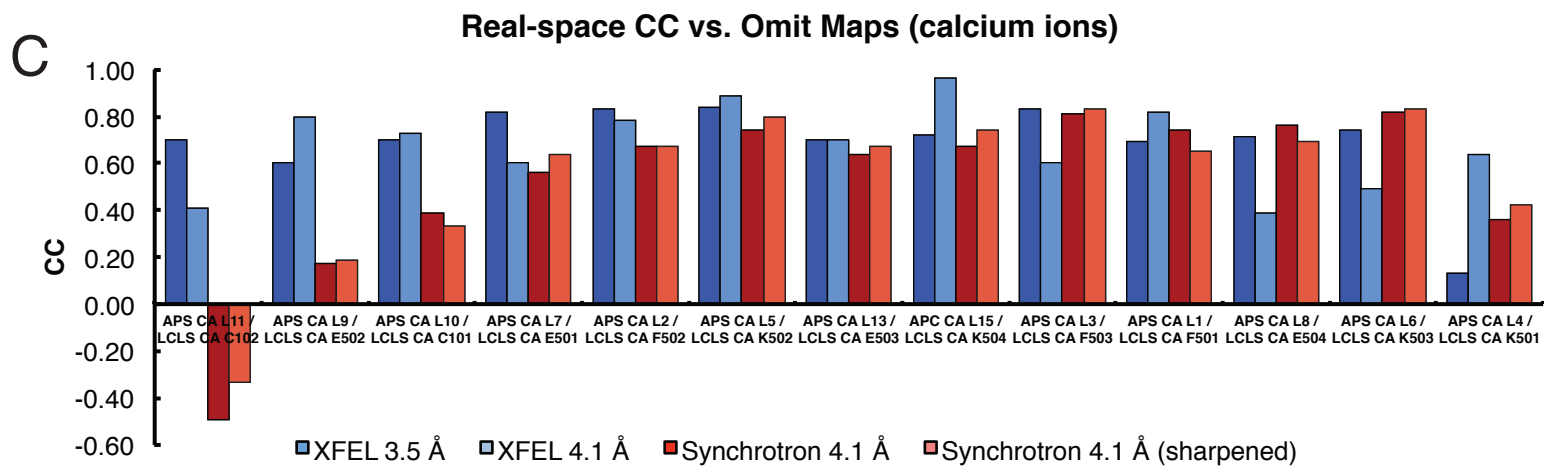

Supplement: supp [file elife-18740-supp-v1.zip]

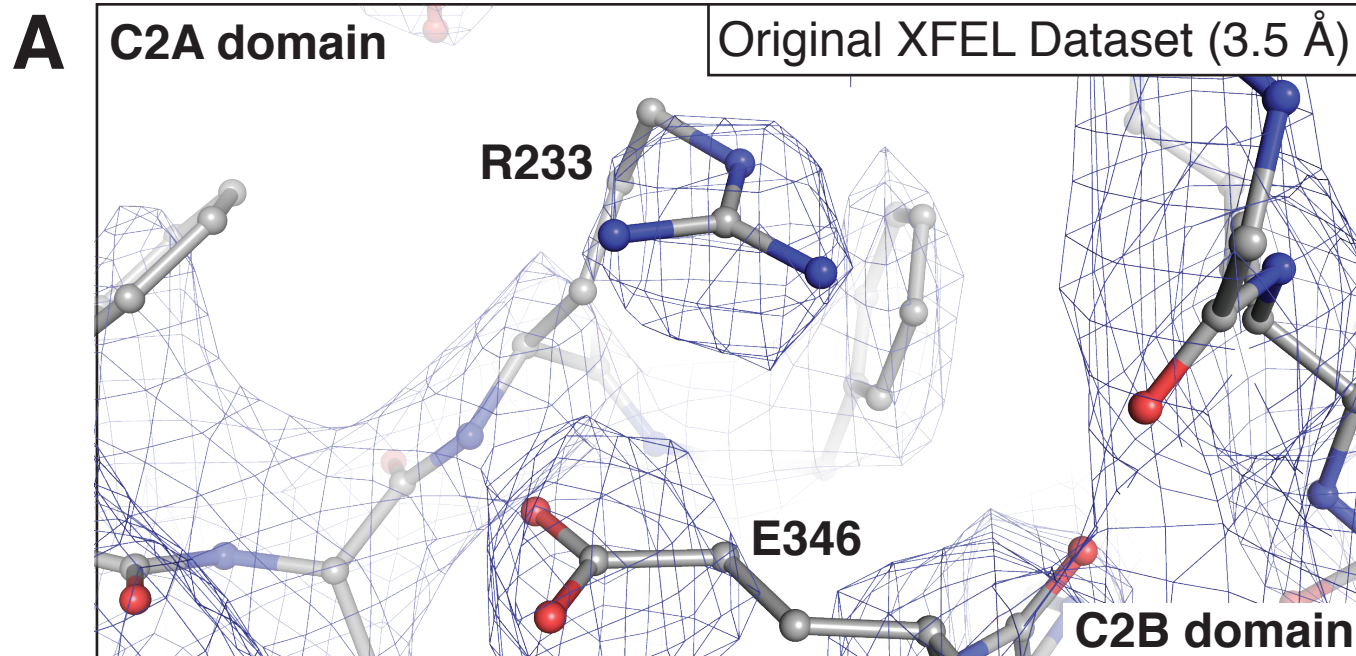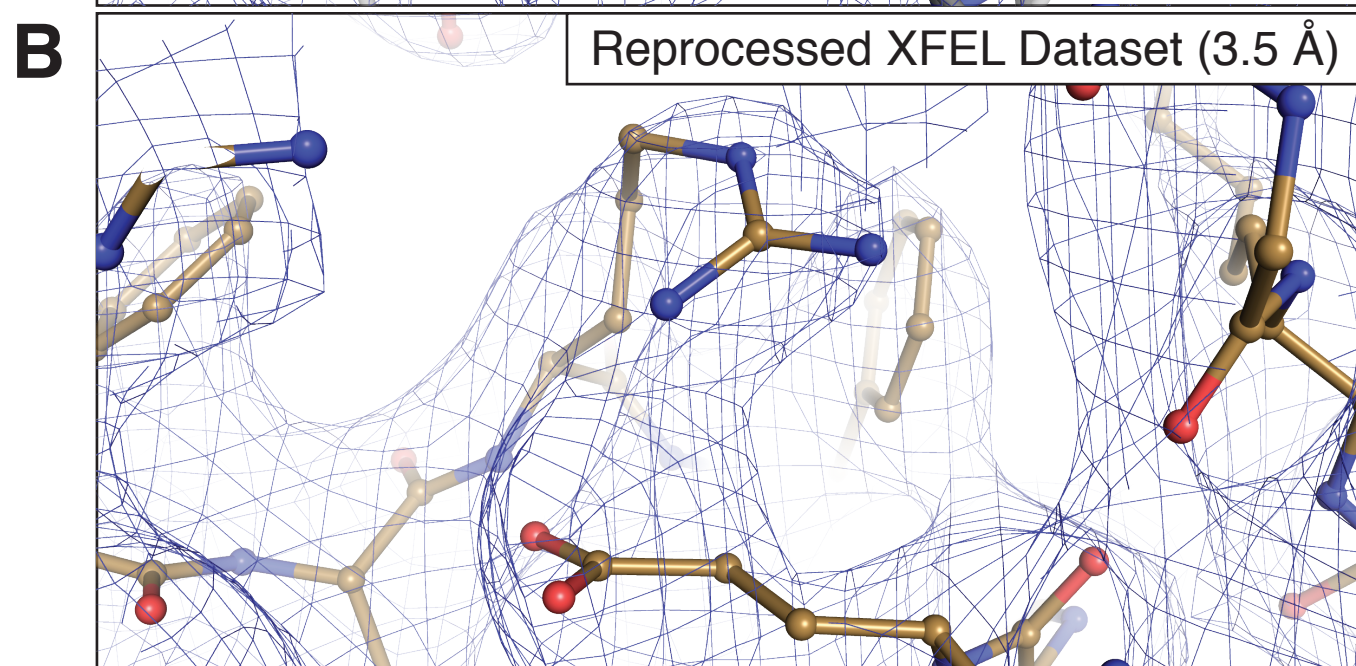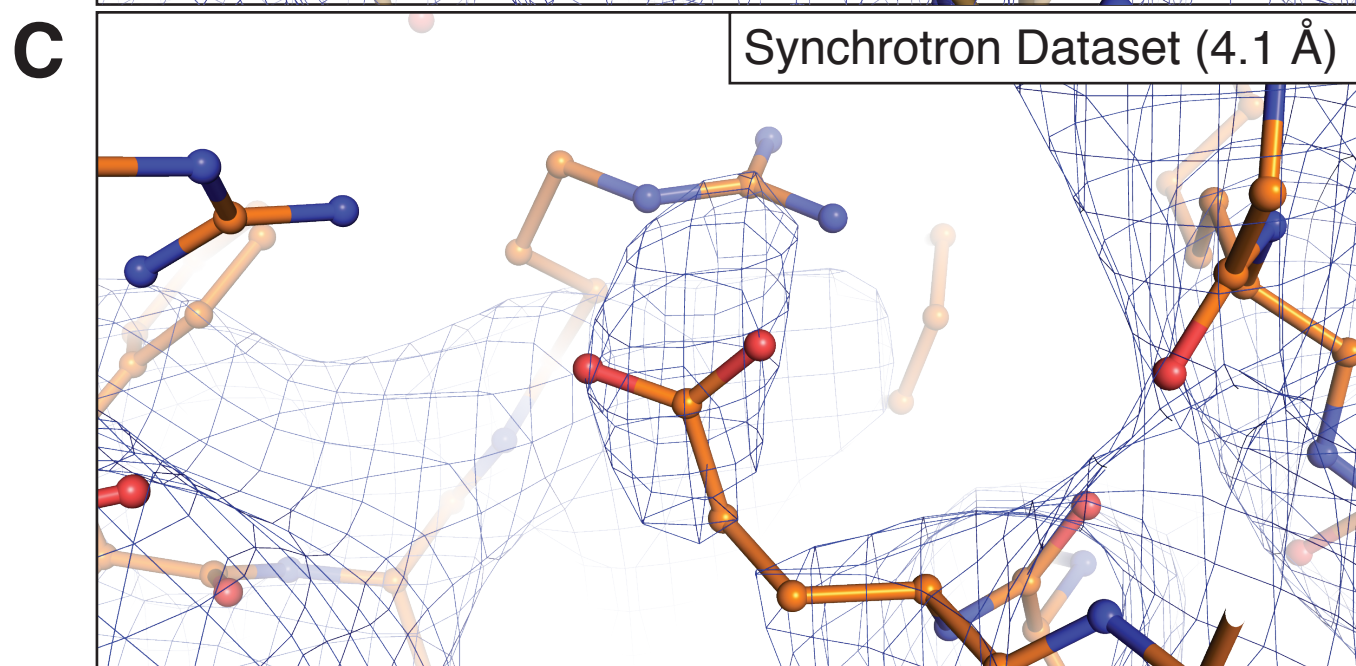

Supplement: supp [file elife-18740-supp-v1.zip]

**A**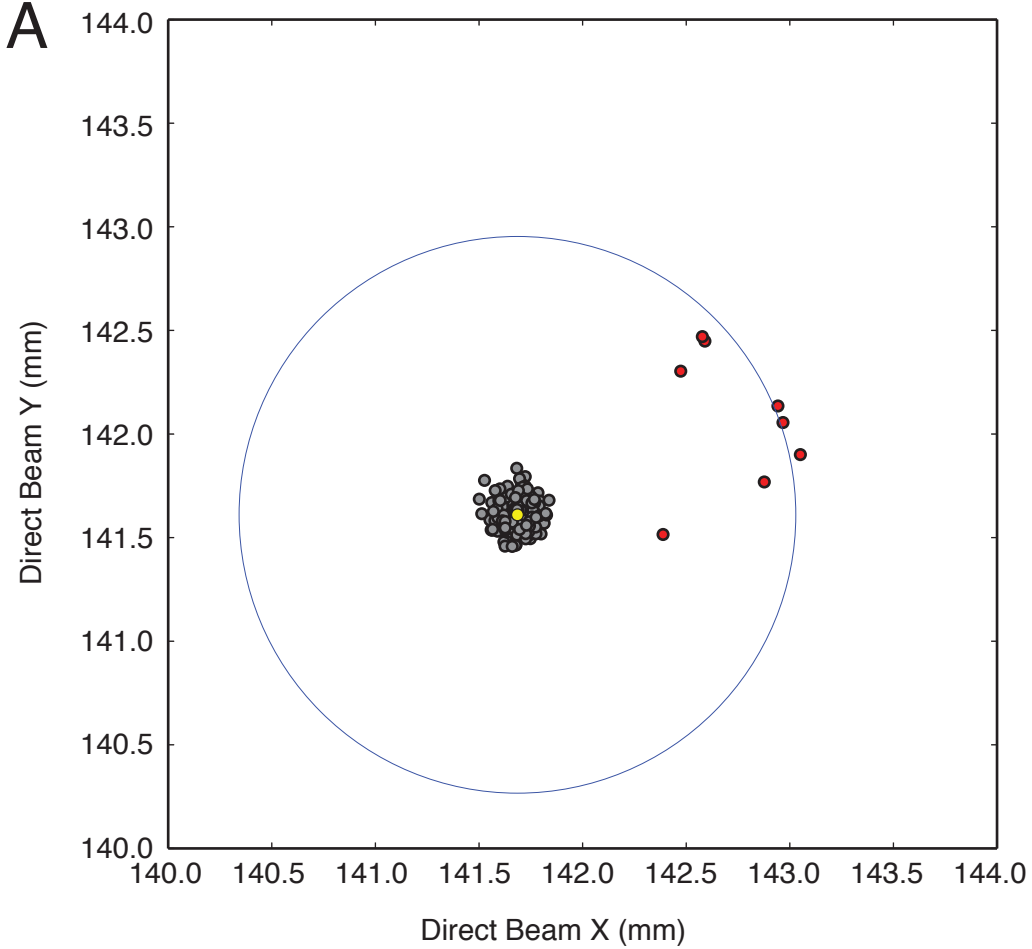**B**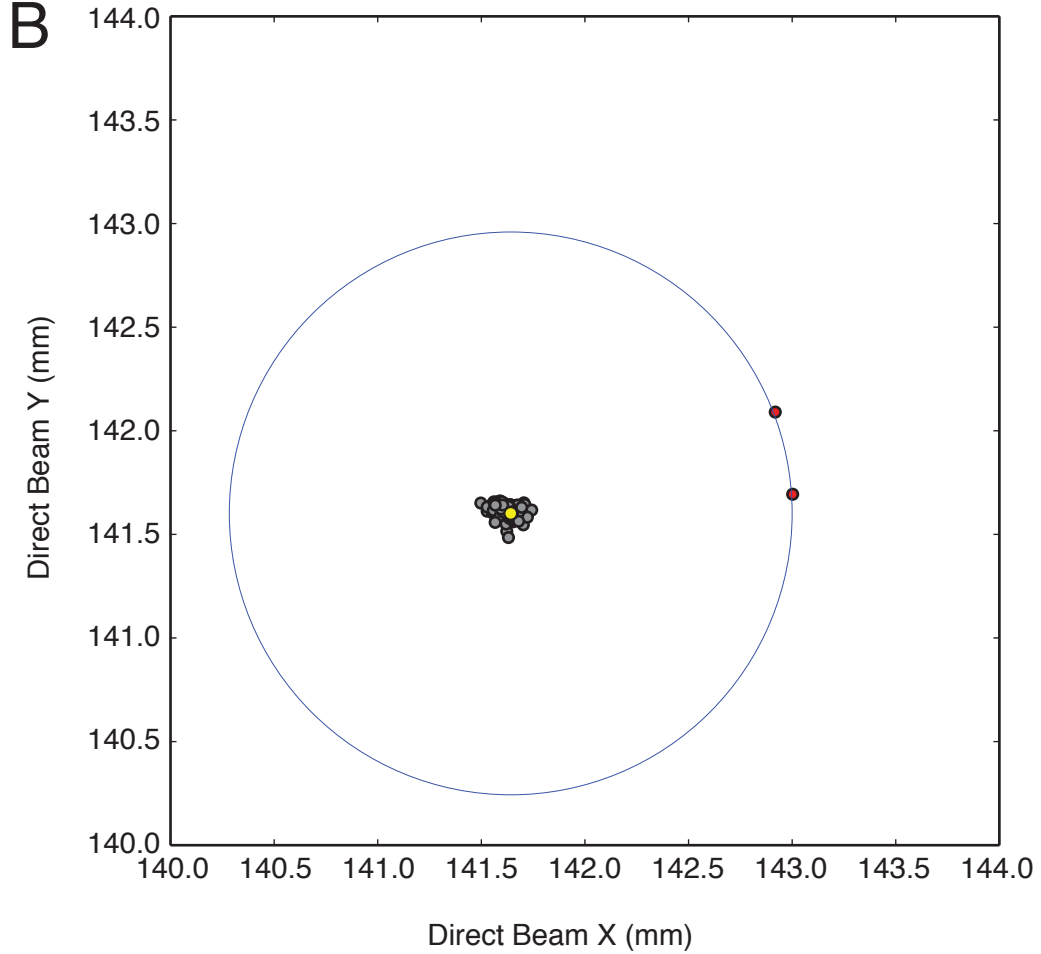

Supplement: supp [file elife-18740-supp-v1.zip]

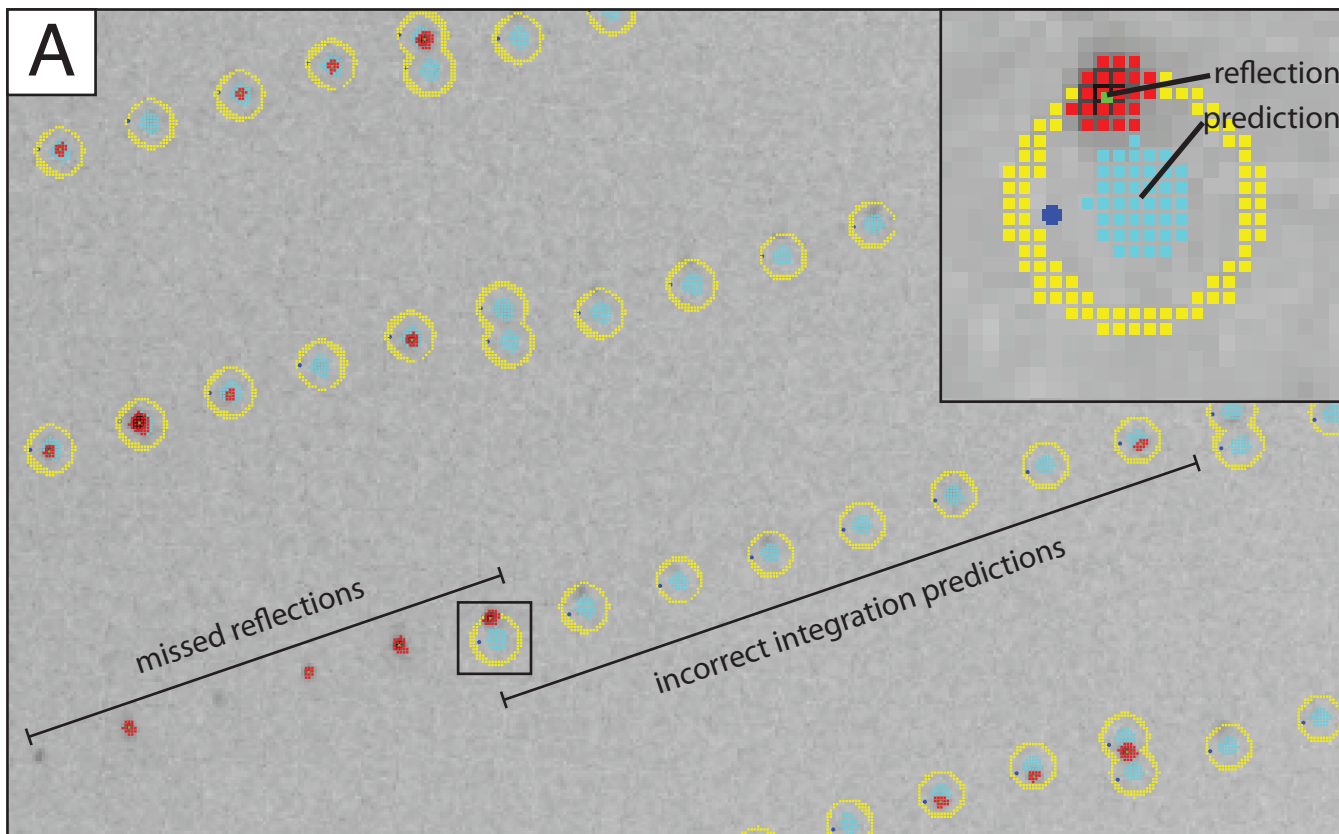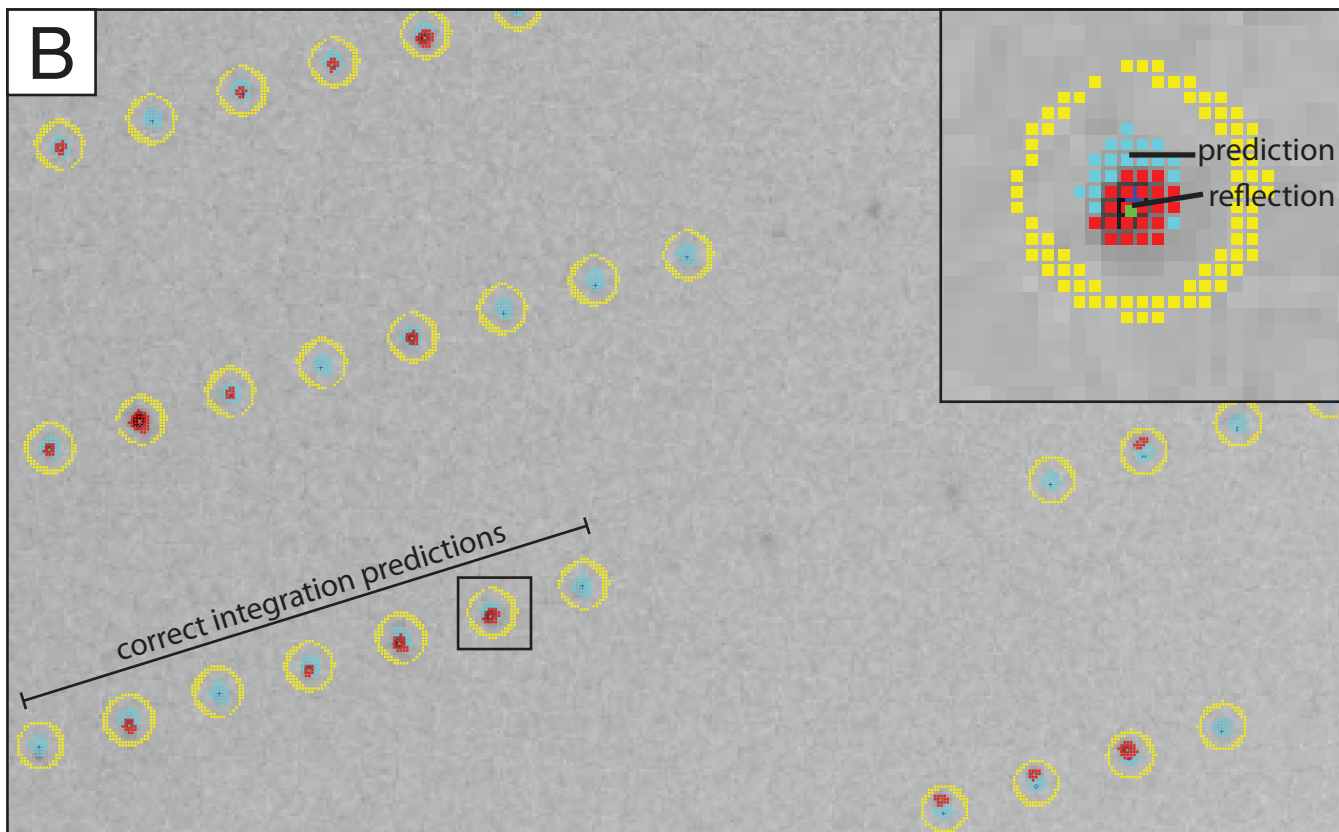

Supplement: supp [file elife-18740-supp-v1.zip]
